# Supplementary material
Source: HighWire-hosted journal article supplement (https://tobaccocontrol.bmj.com/content/32/e2/e228)
Supplement: inline-supplementary-material-1 [file inline-supplementary-material-1.pdf]

**Supplementary Table 1.** Multilevel models predicting appeal for message themes.

|                                         | <i>k</i> | Overall         |            | Past 30 day e-cig users |            | Susceptible e-cig users |            | Non-susceptible e-cig users |            |
|-----------------------------------------|----------|-----------------|------------|-------------------------|------------|-------------------------|------------|-----------------------------|------------|
|                                         |          | <i>n</i> =1,501 |            | <i>n</i> =464           |            | <i>n</i> =649           |            | <i>n</i> =388               |            |
|                                         |          | <i>b</i>        | 95% CI     | <i>b</i>                | 95% CI     | <i>b</i>                | 95% CI     | <i>b</i>                    | 95% CI     |
| Intercept                               |          | 1.51**          | 1.44, 1.58 | 2.25**                  | 2.15, 2.34 | 1.66**                  | 1.61, 1.72 | 1.34**                      | 1.29, 1.41 |
| <b>Message Themes</b>                   |          |                 |            |                         |            |                         |            |                             |            |
| Nicotine Addiction                      | 70       | -.04*           | -.07, -.01 | -.06                    | -.13, .01  | -.03                    | -.08, .02  | -.03                        | -.09, .02  |
| Uses the word “nicotine” <sup>1</sup>   | 62       | -.05*           | -.09, -.02 | -.10*                   | -.17, -.03 | -.02                    | -.07, .03  | -.05                        | -.11, .01  |
| Uses the word “addiction” <sup>1</sup>  | 40       | .004            | -.04, .04  | -.01                    | -.08, .09  | .01                     | -.05, .07  | -.02                        | -.08, .05  |
| Chemicals                               | 66       | -.07*           | -.10, -.04 | -.05                    | -.13, .03  | -.09*                   | -.14, -.04 | -.04                        | -.10, .01  |
| Specific chemical name <sup>2</sup>     | 46       | -.09**          | -.13, -.06 | -.05                    | -.13, .03  | -.16**                  | -.21, -.10 | -.04                        | -.11, .02  |
| Uses the word “chemical” <sup>2</sup>   | 34       | -.04            | -.08, .002 | -.04                    | -.13, .04  | -.01                    | -.08, .05  | -.08*                       | -.15, -.01 |
| Chemical “also found in” <sup>3</sup>   | 19       | .06             | -.02, .14  | .15                     | -.03, .32  | .02                     | -.09, .13  | .04                         | -.10, .19  |
| Health effects on organs (brain, lungs) | 52       | -.09**          | -.13, -.05 | -.12*                   | -.19, -.04 | -.09*                   | -.15, .04  | -.06                        | -.12, .01  |
| Affects lungs <sup>4</sup>              | 31       | .01             | -.06, .08  | -.02                    | -.16, .12  | .01                     | -.09, .11  | .02                         | -.10, .15  |
| Affects brain <sup>4</sup>              | 23       | -.03            | -.10, .04  | -.03                    | -.17, .12  | -.03                    | -.12, .07  | -.01                        | -.13, .12  |
| Industry targeting                      | 42       | -.06*           | .02, .10   | .05                     | -.03, .13  | .08*                    | .02, .14   | .03                         | -.04, .10  |
| Flavors                                 | 29       | .13**           | .08, .18   | .12*                    | .03, .22   | .13**                   | .06, .20   | .14*                        | .06, .21   |
| Comparison to cigarettes                | 27       | -.07*           | -.12, -.02 | -.08                    | -.18, .02  | -.04                    | -.11, .03  | -.12*                       | -.19, -.02 |
| Health-related symptoms                 | 25       | -.05*           | -.10, -.01 | -.09                    | -.19, .01  | -.03                    | -.10, .04  | -.05                        | -.13, .03  |
| Not harmless water vapor                | 48       | -.02            | -.08, .04  | .02                     | -.10, .13  | -.04                    | -.12, .05  | -.05                        | -.15, .05  |
| Death                                   | 12       | -.03            | -.10, .04  | -.08                    | -.23, .07  | -.02                    | -.13, .09  | .02                         | -.09, .14  |
| Unknown ingredients or health effects   | 10       | -.02            | -.10, .06  | -.08                    | -.24, .07  | -.02                    | -.14, .09  | .06                         | -.07, .18  |
| Environmental impact                    | 10       | -.03            | -.11, .04  | -.04                    | -.20, .11  | -.09                    | -.20, .03  | .06                         | -.06, .19  |
| Sharing vapes can spread germs          | 6        | .05             | -.05, .14  | .04                     | -.16, .24  | .06                     | -.08, .21  | -.02                        | -.16, .19  |
| Gateway to cigarette/tobacco use        | 5        | -.14*           | -.24, -.04 | -.15                    | -.37, .06  | -.18*                   | -.33, -.02 | -.05                        | -.22, .13  |

Note. <sup>1</sup> Coded if “Nicotine/Addiction” was “yes”, % is relative; <sup>2</sup> Coded if “chemicals” was “yes”, % is relative; <sup>3</sup> Refers to chemical being found in other materials, coded if “includes specific chemical name” was “yes”, % is relative; <sup>4</sup> Coded if “health effects on organs” was “yes”, % is relative. \**p*<.05, \*\**p*<.001

**Supplementary Table 2.** Multilevel model predicting appeal for message imagery.

|                                     | Overall |       |            | Past 30 day |            | Susceptible |            | Non-susceptible |            |
|-------------------------------------|---------|-------|------------|-------------|------------|-------------|------------|-----------------|------------|
|                                     | n=1,501 |       |            | e-cig users |            | e-cig users |            | e-cig users     |            |
|                                     | k       | b     | 95% CI     | b           | 95% CI     | b           | 95% CI     | b               | 95% CI     |
| <b>Message Imagery</b>              |         |       |            |             |            |             |            |                 |            |
| Contains Imagery                    | 187     | -.01  | -.05, .03  | .03         | -.06, .12  | .01         | -.05, .08  | -.09*           | -.17, -.01 |
| <b>Vaping/Tobacco Imagery</b>       |         |       |            |             |            |             |            |                 |            |
| Vaping device                       | 60      | .00   | -.03, .04  | .02         | -.05, .10  | .003        | -.05, .06  | -.03            | -.09, .03  |
| Disposable                          | 5       | .04   | -.05, .13  | -.02        | -.20, .16  | .02         | -.12, .16  | .15*            | .003, .31  |
| Pre-filled or refillable cartridges | 10      | .00   | -.07, .07  | .01         | -.13, .15  | .04         | -.07, .14  | -.06            | -.17, .04  |
| Refillable tanks or mods            | 6       | -.01  | -.08, .07  | .02         | -.13, .17  | -.01        | -.12, .11  | -.03            | -.15, .09  |
| Pod mod                             | 31      | -.02  | -.06, .02  | .02         | -.07, .10  | -.03        | -.09, .04  | -.05            | -.12, .02  |
| Vaping accessory                    | 19      | -.06  | -.12, -.01 | -.10        | -.21, .02  | -.09*       | -.18, -.01 | .03             | -.07, .12  |
| E-juice bottle                      | 2       | .11   | -.31, .09  | .05         | -.40, .49  | .27         | -.56, .02  | .06             | -.15, .27  |
| Pod                                 | 14      | .12   | -.03, .26  | -.13        | -.46, .21  | .22*        | .04, .41   | .03             | -.10, .17  |
| Battery                             | 3       | -.10  | -.27, .08  | .15         | -.28, .57  | -.15        | -.38, .07  | -.08            | -.24, .08  |
| Smoke or vapor                      | 48      | .01   | -.03, .05  | .01         | -.07, .08  | .04         | -.02, .10  | -.02            | -.09, .04  |
| Combustible cigarette               | 17      | -.07* | -.13, -.01 | -.06        | -.18, .06  | -.06        | -.15, .02  | -.10            | -.20, .00  |
| Person using vaping device          | 14      | .05   | -.01, .12  | .06         | -.08, .19  | .08         | -.02, .17  | .03             | -.08, .13  |
| <b>Warning Imagery</b>              |         |       |            |             |            |             |            |                 |            |
| Warning symbol                      | 17      | -.03  | -.08, .03  | -.04        | -.15, .08  | -.02        | -.11, .06  | -.01            | -.11, .08  |
| Graphic image                       | 7       | -.13* | -.22, -.04 | -.29*       | -.48, -.10 | .13*        | -.26, -.01 | .07             | -.09, .23  |
| Nicotine chemical symbol            | 4       | -.17* | -.29, -.05 | -.31*       | -.53, .08  | -.03        | -.21, .14  | -.23*           | -.44, -.02 |
| <b>Other Imagery</b>                |         |       |            |             |            |             |            |                 |            |
| Person's face                       | 45      | .05*  | .01, .09   | .07         | -.01, .15  | .05         | -.01, .11  | .02             | -.04, .09  |
| Type of person <sup>3</sup>         |         |       |            |             |            |             |            |                 |            |
| Teen                                | 33      | .04   | -.004, .08 | .02         | -.07, .11  | .05         | -.01, .12  | .04             | -.03, .11  |
| Adult                               | 12      | .06   | -.01, .13  | .20*        | .05, .35   | .03         | -.07, .13  | -.02            | -.14, .09  |
| Animal                              | 17      | -.03  | -.09, .03  | -.01        | -.13, .11  | -.04        | -.13, .05  | -.03            | -.13, .07  |
| Food                                | 12      | .15** | .09, .22   | .07         | -.07, .21  | .23**       | .13, .33   | .11             | -.01, .23  |

Note. \* $p < .05$ , \*\* $p < .001$

**Supplementary Table 3.** Multilevel models predicting appeal for other message features.

|                              | Overall<br><i>n</i> =1,501 |          |           | Past 30 day<br>e-cig users<br><i>n</i> =464 |            | Susceptible<br>e-cig users<br><i>n</i> =649 |            | Non-susceptible<br>e-cig users<br><i>n</i> =388 |           |
|------------------------------|----------------------------|----------|-----------|---------------------------------------------|------------|---------------------------------------------|------------|-------------------------------------------------|-----------|
|                              | <i>k</i>                   | <i>b</i> | 95% CI    | <i>b</i>                                    | 95% CI     | <i>b</i>                                    | 95% CI     | <i>b</i>                                        | 95% CI    |
| <b>Other</b>                 |                            |          |           |                                             |            |                                             |            |                                                 |           |
| <i>Text Features</i>         |                            |          |           |                                             |            |                                             |            |                                                 |           |
| Includes “fact” or “factoid” | 48                         | .03      | -.01, .07 | .01                                         | -.07, .08  | .05                                         | -.01, .11  | .01                                             | -.05, .08 |
| Uses a hashtag (#)           | 27                         | .07*     | .03, .12  | -.00                                        | -.10, .10  | .15**                                       | .08, .22   | .04                                             | -.05, .12 |
| Poses a question             | 23                         | -.05     | -.10, .00 | -.00                                        | -.11, .11  | -.11*                                       | -.19, -.03 | -.01                                            | -.09, .08 |
| Uses a statistic             | 22                         | .13**    | .07, .18  | .10                                         | .00, .21   | .14**                                       | .06, .22   | .13*                                            | .03, .22  |
| Cites specific study         | 4                          | -.11     | -.22, .01 | -.16                                        | -.40, .08  | -.07                                        | -.24, .09  | -.11                                            | -.33, .12 |
| <i>Message Perspective</i>   |                            |          |           |                                             |            |                                             |            |                                                 |           |
| Uses word “you”              | 79                         | -.04*    | -.07, .01 | -.02                                        | -.09, .04  | -.06*                                       | -.11, -.01 | -.02                                            | -.08, .03 |
| Uses words “I” or “we”       | 16                         | .01      | -.05, .07 | -.15*                                       | -.28, -.03 | .09                                         | -.00, .18  | .07                                             | -.03, .18 |
| Uses word “teen”             | 10                         | .13*     | .05, .20  | .10                                         | -.05, .24  | .08                                         | -.03, .20  | .26**                                           | .11, .40  |
| <i>Other Features</i>        |                            |          |           |                                             |            |                                             |            |                                                 |           |
| Source included              | 122                        | -.01     | -.04, .02 | -.07*                                       | -.14, -.01 | .02                                         | -.03, .07  | .002                                            | -.05, .06 |
| Bright/vivid Colors          | 89                         | .06**    | .03, .09  | .02                                         | -.05, .08  | .12**                                       | .07, .17   | .006                                            | -.05, .06 |
| Internet meme                | 6                          | .08      | -.02, .18 | .13                                         | -.07, .33  | .09                                         | -.05, .23  | .005                                            | -.16, .17 |

Note. \* $p < .05$ , \*\* $p < .001$
